# Supplementary material
Source: HighWire-hosted journal article supplement (https://ard.bmj.com/content/annrheumdis-2020-217967)
Supplement: inline-supplementary-material-1 [file inline-supplementary-material-1.pdf]

Lupus Survey HCQ  
Plüß et al.

Ann Rheum Dis  
Letter

## Supplement

### Methods

The survey included 19 questions (supplementary Table 1) and was designed and conducted using the open-source software LimeSurvey (Limesurvey GmbH./LimeSurvey Version 3.22.8+200309: An Open Source survey tool /LimeSurvey GmbH, Hamburg, Germany. URL <http://www.limesurvey.org>). The survey was open for online participation from April 27 to May 8, 2020. Ethics approval was obtained (Protocol number 35/4/20). The link to the survey was distributed via the German Lupus self-help organization (Lupus Erythematodes Selbsthilfegemeinschaft e.V.) communication channels. Data were exported and analyzed with GraphPad Prism version 8 (Version 8.4.0 for macOS, GraphPad Software, La Jolla California USA, [www.graphpad.com](http://www.graphpad.com)).

**Table S1. Survey questions (translated version from German).**

| No | Question                                                                                                 | Answer options                                                                                                                                                                                                                                         |
|----|----------------------------------------------------------------------------------------------------------|--------------------------------------------------------------------------------------------------------------------------------------------------------------------------------------------------------------------------------------------------------|
| 1  | Do you suffer from systemic lupus erythematosus (SLE)?                                                   | Yes – question 2<br>No – end of survey                                                                                                                                                                                                                 |
| 2  | What is your gender?                                                                                     | Male<br>Female<br>Diverse                                                                                                                                                                                                                              |
| 3  | How old are you?                                                                                         | 18-30 years<br>31-40 years<br>41-50 years<br>51-60 years<br>61-70 years<br>>70 years                                                                                                                                                                   |
| 4  | Do you suffer from one or more of the following organ manifestations of SLE? Please tick all that apply. | Joints (arthritis)<br>Skin (cutaneous lupus)<br>Kidney/renal (lupus nephritis)<br>Lung/pulmonary<br>Heart (Myocarditis, endocarditis)<br>Fluid collections (serositis)<br>Central nervous system (neuropsychiatric lupus)<br>Blood count abnormalities |

Lupus Survey HCQ  
Plüß et al.Ann Rheum Dis  
Letter

|    |                                                                                                                                                                  |                                                                                                                                                                                                                                                                                                       |
|----|------------------------------------------------------------------------------------------------------------------------------------------------------------------|-------------------------------------------------------------------------------------------------------------------------------------------------------------------------------------------------------------------------------------------------------------------------------------------------------|
|    |                                                                                                                                                                  | (hematological)<br>Other (please specify)                                                                                                                                                                                                                                                             |
| 5  | Do you take hydroxychloroquine or chloroquine as part of your SLE treatment regime?                                                                              | Yes – question 6<br>No – end of survey                                                                                                                                                                                                                                                                |
| 6  | What is your daily dose of hydroxychloroquine or chloroquine?                                                                                                    | 200 mg<br>400 mg<br>200/400 mg alternating<br>Other (please specify)                                                                                                                                                                                                                                  |
| 7  | How long have you been taking hydroxychloroquine/chloroquine? Please tick.                                                                                       | < 1 year<br>1-5 years<br>6-10 years<br>> 10 years                                                                                                                                                                                                                                                     |
| 8  | Do you sometimes forget to take your hydroxychloroquine/chloroquine medication? If so, how often (on a weekly average)?                                          | 0, I never forget to take this medication<br>1-2 days per week<br>3 days per week<br>More than 3 days per week                                                                                                                                                                                        |
| 9  | Do you take any other medication for the management of SLE? If so, please tick all that apply.                                                                   | Prednisone (or other glucocorticoids/steroids)<br>Methotrexate (MTX)<br>Azathioprine<br>Mycophenolate<br>Cyclosporine<br>Tacrolimus<br>Belimumab (Benlysta)<br>Cyclophosphamide<br>Other (please specify)                                                                                             |
| 10 | Do you consider hydroxychloroquine/chloroquine essential for your SLE treatment?                                                                                 | Yes<br>No                                                                                                                                                                                                                                                                                             |
| 11 | Have you experienced any side effects or adverse reactions of this medication? If so, please specify.                                                            | Yes<br>No                                                                                                                                                                                                                                                                                             |
| 12 | Have you experienced problems securing your hydroxychloroquine/chloroquine medication due to the Covid-19 pandemic?                                              | No, I have not experienced any problems<br>Yes, I have received a different product<br>Yes, I had to source it via a different pharmacy<br>Yes, I was unable to get my medication through a pharmacy at all<br>Yes, I only received my medication after my doctor intervened<br>Other, please specify |
| 13 | Are you concerned or afraid of being unable to secure your hydroxychloroquine/chloroquine medication in the coming weeks/months due to supply chain disruptions? | Yes<br>No                                                                                                                                                                                                                                                                                             |

Lupus Survey HCQ  
Plüß et al.

Ann Rheum Dis  
Letter

|    |                                                                                                                             |                                                                                             |
|----|-----------------------------------------------------------------------------------------------------------------------------|---------------------------------------------------------------------------------------------|
| 14 | Have you reduced your hydroxychloroquine/chloroquine dose or skipped doses in order to bridge possible supply shortages?    | Yes<br>No                                                                                   |
| 15 | Do you consider yourself protected from an infection with SARS-CoV2/Covid-19 due to hydroxychloroquine/chloroquine therapy? | Yes<br>No                                                                                   |
| 16 | Are you concerned about an increased vulnerability to Covid-19 due to the medications you take for SLE?                     | Yes<br>No                                                                                   |
| 17 | Have you been infected with SARS-CoV2/suffered from Covid-19 disease?                                                       | Yes – question 17<br>No – Question 18                                                       |
| 18 | If so, how severe was the Covid-19 disease course?                                                                          | Mild, I was able to recover at home<br>Moderate to severe, I required admission to hospital |
| 19 | Please share any other thoughts you may have concerning this topic in the comments section below.                           |                                                                                             |
